# Supplementary material for: MicroRNA Signatures in Human Ovarian Cancer
Source: Oxford University Press journal article supplement (doi:10.1158/0008-5472.can-07-1936), 2007-09-15
Supplement: 00085472can071936-sup-iorio_mv_table_s4.xls [file 00085472can071936-sup-iorio_mv_table_s4.xls]

## Sheet: Sheet1
TABLE S4
SEROUS VS ENDOMETRIOID						ENDOMETRIOID VS NON-ENDOMETRIOID
Positive genes						Positive genes
Gene Name		Score(d)		Fold Change		Gene Name	Score(d)	Fold Change
hsa-miR-302b*		2.11621		4.56224		hsa-miR-212	2.43292	2.07384
hsa-miR-325		1.95796		2.80432		Negative genes
hsa-miR-299-5p		1.98312		2.73385		Gene Name	Score(d)	Fold Change
hsa-miR-222		2.06732		2.51906		hsa-miR-22	-1.6568	0.204983
hsa-miR-324-3p		2.01237		2.40274		hsa-miR-302b*	-2.04161	0.248819
hsa-miR-196b		2.22275		1.95115		hsa-miR-299-5p	-2.03419	0.341389
hsa-miR-135b		2.0872		1.81754		hsa-mir-325	-2.06547	0.357017
Negative genes						hsa-miR-194	-1.72788	0.378904
Gene Name		Score(d)		Fold Change		hsa-miR-101	-1.785	0.37959
hsa-miR-212		-2.53395		0.455394		hsa-mir-373	-1.69629	0.387321
hsa-miR-150		-2.47781		0.531182		hsa-miR-324-3p	-1.9777	0.424134
SEROUS VS NON-SEROUS						hsa-mir-222	-1.78322	0.426206
Positive genes						CLEAR CELL VS NON-CLEAR CELL
Gene Name		Score(d)		Fold Change		Positive genes
hsa-miR-302b*		1.88569		2.38717		Gene Name	Score(d)	Fold Change
hsa-miR-22		1.87608		2.28914		hsa-miR-30a-5p	2.56786	3.18069
hsa-mir-373		1.96715		2.02699		hsa-miR-29b	2.54856	2.67475
Negative genes						hsa-miR-30e-5p	2.09092	2.63276
Gene Name		Score(d)		Fold Change		Negative genes
hsa-miR-148b		-1.93504		0.473389		Gene Name	Score(d)	Fold Change
hsa-miR-211		-1.52466		0.380841		hsa-miR-20a	-2.0865	0.408227
POORLY DIFFERENTIATED (PD) VS NON-PD
Negative genes
Gene Name	Score(d)		Fold Change
hsa-mir-9	-1.66766		0.304968
hsa-mir-18	-1.5734		0.275779
