# Supplementary material for: MicroRNA Signatures in Human Ovarian Cancer
Source: Oxford University Press journal article supplement (doi:10.1158/0008-5472.can-07-1936), 2007-09-15
Supplement: 00085472can071936-sup-iorio_mv_table_s5.xls [file 00085472can071936-sup-iorio_mv_table_s5.xls]

## Sheet: Sheet1
Table S5
LYMPHOVASCULAR INVASION
Negative genes
Gene Name	Score(d)	Fold Change	q-value(%)
hsa-mir-144	-1.96	0.215959	0
hsa-mir-216	-1.33255	0.41718	0
OVARIAN SURFACE INVOLVEMENT
Positive genes
Gene Name	Score(d)	Fold Change	q-value(%)
hsa-mir-101	2.01827	2.24303	0
hsa-miR-182*	1.56125	2.06554	0
hsa-mir-22	1.40153	2.45795	0
hsa-miR-133a	1.38105	3.45049	0
TUBAL INVOLVEMENT
Negative genes
Gene Name	Score(d)	Fold Change	q-value(%)
hsa-mir-137	-1.90907	0.372568	0
hsa-mir-101	-1.747	0.390419	0
hsa-mir-215	-1.41787	0.324648	0
hsa-mir-211	-1.19785	0.407288	0
PELVIC PERITONEUM
Positive genes
Gene Name	Score(d)	Fold Change	q-value(%)
hsa-miR-302c	1.15047	2.29337	0
UTERUS INVOLVEMENT
Positive genes
Gene Name	Score(d)	Fold Change	q-value(%)
hsa-mir-133a-2	1.27588	3.26617	0
hsa-mir-143	1.91133	2.36272	0
hsa-mir-145	1.82832	2.2823	0
hsa-mir-1	1.57557	2.2782	0
hsa-mir-147	0.9966	2.11549	0
hsa-miR-126	1.36024	2.0866	0
