# Supplementary material for: MicroRNA Signatures in Human Ovarian Cancer
Source: Oxford University Press journal article supplement (doi:10.1158/0008-5472.can-07-1936), 2007-09-15
Supplement: 00085472can071936-sup-iorio_mv_table_s6.xls [file 00085472can071936-sup-iorio_mv_table_s6.xls]

## Sheet: Sheet1
Table S6
miRs UP-modulated in ovarian carcinoma	CONFIRMED TARGET	EXPRESSION IN OVARIAN CARCINOMA	PUTATIVE TARGETS	EXPRESSION IN OVARIAN CARCINOMA
miR-200a			BAP1	DOWN
			PDCD4	down in other tumors
			GATA6	DOWN
			VCAM-1	DOWN
miR-200b			BAP1	DOWN
			GATA4	DOWN
			FN1 (fibronectin 1)	DOWN
miR-200c			BAP1	DOWN
			FN1 (fibronectin 1)	DOWN
miR-141	CLOCK (Kiriakidou M. Et al, 2004)		BAP1	DOWN
miRs DOWN-modulated in ovarian carcinoma
miR-140	HDAC4 (Tuddenham L. et al, 2006)	UP	c-SRK	UP
			MMP13	UP
			FGF2	UP
miR-199a			CCNL1	UP (other tumor types)
miR-199b	LAMC2 (Kiriakidou M. Et al, 2004)	UP (other cancers)
miR-145	FLJ21308 (Kiriakidou M. Et al, 2004)
miR-143	ERK5 (Esau et al, 2004)	UP (other cancers)	COX-2 (strongly correlates with resistance to chemotherapy and poor outcome in ovarian cancer)	UP
miR-125a	ERBB2, ERBB3 (Scott et al, 2007)	UP
miR-125b	ERBB2, ERBB3 (Scott et al, 2007)	UP
miR-101	Enx-1 (Lewis et al, 2003)		COX-2	UP
	MYCN (Lewis et al, 2003)	UP
miR-212			WT1, BRCA1
miR-222	c-KIT (Felli et al, 2005)	higher in high-grade compared with low-grade OSC
